1 **Bacterial but not protist gut microbiota align with**  
2 **ecological specialization in a set of lower termite species**

3 Lena Waidele, Judith Korb, Sven Künzel, Franck Dedeine, and Fabian Staubach

4

5 **Author affiliations**

6 For L. Waidele, J. Korb, and F. Staubach see corresponding author address

7

8 Sven Künzel, Max Planck Institute for Evolutionary Biology, August-Thienemann-  
9 Str. 2, 24306 Plön, Germany

10

11 Franck Dedeine, Institut de Recherche sur la Biologie de l’Insecte, UMR 7261,  
12 CNRS - Université François-Rabelais de Tours, Tours, France

13

14 **Running title**

15 bacteria and protist communities in lower termites.

16 sequencing

17

18 **Keywords**

19 termite, 16S 18S rRNA gene sequencing, microbial ecology, evolution, host and  
20 microbe

21

22 **Corresponding author**

23 Dr. Fabian Staubach

24 Biologie I

25 Universitaet Freiburg

26 Hauptstr. 1

27 79104 Freiburg

28 Germany

29 phone: +49-761-203-2911

30 fax: +49-761-203-

31 email: [fabian.staubach@biologie.uni-freiburg.de](mailto:fabian.staubach@biologie.uni-freiburg.de)

### 32 **Conflict of interest statement**

33 The authors declare no conflict of interest.

34

### 35 **Funding**

36 This work was funded by DFG grants STA1154/2-1 and K01895/6-4.

37

38

39

40

41

42

43

44

45

46

47

48

49

50

51

52

53

54

55

56 **Abstract**

57 The role of microbes in adaptation of higher organisms to the environment is  
58 becoming increasingly evident, but remains poorly understood. Protist and  
59 bacterial microbes facilitate that lower termites thrive on wood and are directly  
60 involved in substrate break down. During the course of evolution lower termites  
61 adapted to different diets and lifestyles. In order to test whether there are  
62 changes of the termite gut microbiota that co-occur and hence could be related  
63 to diet and lifestyle adaptation, we assessed the bacterial and protist  
64 communities in a multispecies framework profiling three wood-dwelling and two  
65 foraging lower termite species using 16S and 18S rRNA gene amplicon  
66 sequencing. Termites were kept under controlled conditions on the same diet to  
67 minimize environmental effects on their gut microbiota. We found that protist  
68 communities group according to host phylogeny while bacterial communities  
69 group according to lifestyle. The change from the ancestral wood-dwelling to a  
70 foraging lifestyle coincides with exposure to more diverse and higher  
71 concentrations of pathogens as well as a more diverse diet. Accordingly, we  
72 identified bacteria that are associated with foraging termites of the genus  
73 *Reticulitermes* and could function as probiotics or be metabolically important on  
74 a more diverse diet. Furthermore, protist and bacterial diversity are correlated,  
75 suggesting not only that many termite gut bacteria are associated with protists,  
76 but also suggesting a role of protist diversity in the evolution of bacterial diversity  
77 in the termite gut or vice versa.

78

79 **Introduction**

80 The importance of microbes in the evolution of higher organisms is starting to be  
81 realized (Feldhaar, 2011; McFall-Ngai et al., 2013; Wang et al., 2015). Metazoan  
82 evolution is not only driven by pathogenic microbes. Instead, microbes often are  
83 important facilitators of adaptation of higher organisms to the environment

84 (McFall-Ngai et al., 2012; Douglas, 2015). The evolution of organisms is often so  
85 strongly intertwined with that of their associated microbes that Zilber-Rosenberg  
86 and Rosenberg (2008) suggested the host organism and its associated microbes  
87 should be treated as an evolutionary entity, the holobiont. However, most studies  
88 that aim at shedding light on the mechanisms of adaptation still focus on the host  
89 organisms all but ignoring its associated microbial communities.

90 The gut microbial communities of wood-feeding roaches and termites  
91 facilitated their ability to thrive on a wood diet. Wood is difficult to digest and  
92 poor in nitrogen. The ability to thrive on this resource has intrigued scientists for  
93 decades (e.g. Cleveland, 1923, 1925, Breznak et al. 1973). This interest was  
94 further spurred by the perspective to leverage insights into the process of  
95 lignocellulose break down in termites for the generation of biofuel (Scharf, 2015).  
96 Today, we can rely on extensive insights into the processes of lignocellulose  
97 break down and nitrogen fixation in the termite gut (Breznak et al., 1973;  
98 Warnecke et al., 2007; Hongoh et al., 2008b, 2008a; Brune and Dietrich, 2015;  
99 Ohkuma et al., 2015). For the breakdown of lignocellulose, lower termites depend  
100 on protists in their gut (Cleveland, 1923, 1925). These protists belong to the  
101 order Oxymonadida (phylum Preaxostyla), which are specific to termite and  
102 wood-feeding roach guts, and the phylum Parabasalia. The protists are  
103 transmitted between colony members and from parent to offspring via proctodeal  
104 trophallaxis. This vertical transmission contributes to patterns of cospeciation  
105 between protist and termite host (Noda et al., 2007; Desai et al., 2010). In return,  
106 most of the protists live in symbioses with ecto- and endosymbiotic bacteria. The  
107 bacterial termite gut microbiome consists of these protist-associated symbionts  
108 as well as bacteria freely living in the gut (Bauer et al., 1999; Breznak, 2002).  
109 Although vertical transmission of bacteria between termites is not as strict as for  
110 the mostly anaerobic protists (Noda et al., 2009), cospeciation can occur (Noda et  
111 al., 2007; Ohkuma, 2008; Ikeda-Ohtsubo and Brune, 2009; Desai et al., 2010).

112           The microbial communities of termites share a common origin with the  
113 microbial communities of cockroaches (Ohkuma et al., 2009; Schauer et al.,  
114 2012; Dietrich et al., 2014). Since the evolutionary split of termites from  
115 cockroaches, lower termites have diversified and adapted to a variety of  
116 environments (Eggleton and Tayasu, 2001), lifestyles (Abe, 1987), and diets  
117 (Donovan et al., 2001). Given the direct involvement of termite gut microbes in  
118 food digestion, the microbiota could play a role in adaptation to new diets (Zhang  
119 and Leadbetter, 2012). Prokaryotes that are beneficial for the termite host on a  
120 new diet can be acquired from the environment. The presence of such newly  
121 acquired microbes may indeed be reflected by the many taxon specific gut  
122 bacteria found in termites (Hongoh et al., 2005; Dietrich et al., 2014; Rahman et  
123 al., 2015; Tai et al., 2015). As a consequence of the acquisition of new bacteria  
124 that are beneficial under new dietary conditions, the termite associated microbial  
125 communities would change according to host diet. In fact, it has been shown that  
126 both, diet and evolutionary history, shape the gut microbiota of termites (Boucias  
127 et al., 2013; Dietrich et al., 2014; Rahman et al., 2015; Tai et al., 2015), with a  
128 larger impact of diet in higher termites (He et al., 2013; Mikaelyan et al., 2015a;  
129 Rossmassler et al., 2015). While the phylogenetic imprint on microbial  
130 communities is evident, it is not completely clear from these studies what leads  
131 to the diet related differences in microbial communities. These differences could  
132 be driven by environmental microbes that are ingested and passage the gut.  
133 Such passengers do not necessarily form any evolutionary relationship with  
134 termites. However, such a relationship would be expected for microbes that play  
135 a role in diet adaptation. In order to effectively disentangle passaging microbes  
136 from microbes that persist in the termite gut, potentially forming a stable  
137 relationship, it is necessary to control the environment of the termite host  
138 including the diet.

139 Furthermore, termites that change their lifestyle from wood-dwelling  
140 (single piece nesting according to Abe 1987) to foraging outside the nest  
141 (separate and intermediate nesting type according to Abe 1987), are expected to  
142 encounter more diverse and a higher load of microbes. Most foraging termite  
143 species are exposed to microbe rich soil ( $4 \times 10^6$  colony forming units, Vieira and  
144 Nahas, 2005), carrying on average 5000 times more microbes than even the  
145 nests of damp wood-dwelling termites (800 colony forming units, Rosengaus et  
146 al. 2003). As a consequence microbial diversity should be higher in foraging  
147 species. Moreover, an increase in bacterial community diversity should be more  
148 pronounced than an increase in protist diversity because bacteria are more  
149 readily acquired from the environment when compared to anaerobic protists. The  
150 foraging lifestyle also opens the termite colony to invasion by fungal and  
151 bacterial pathogens (Korb et al., 2012, 2015) These pathogens exert selection  
152 pressures on the hosts that have led to a variety of defensive strategies  
153 (Rosengaus et al., 2011). However, the possibility that microbes themselves play  
154 a role in the defense of social insect colonies as probiotics or defensive symbionts  
155 has largely been neglected. This is surprising because defensive symbionts are  
156 known from many other insects (e.g. Kaltenpoth et al., 2005).

157 In this study we sought to test whether an evolutionary switch in host  
158 lifestyle and diet co-occurs with a change in microbial communities of lower  
159 termites. Furthermore, we intended to identify microbes that correlate in  
160 presence or abundance with this evolutionary switch, and hence could be  
161 functionally related to evolutionary change. The third objective was to test  
162 whether the foraging termites in our study carry an increased microbial diversity,  
163 specifically bacterial diversity. Therefore, we analyzed the microbial communities  
164 of five termite species that were kept under common conditions. These species  
165 comprised two species of wood-dwelling kalotermitids (*Cryptotermes secundus*,  
166 *Cryptotermes domesticus*), a wood-dwelling rhinotermitid (*Prorethra*

167 *simplex*), and two species of rhinotermitids that switched from the ancestral  
168 wood-dwelling lifestyle to foraging (*Reticulitermes flavipes*, *Reticulitermes*  
169 *grassei*, Figure 1). Because there can be substantial variation of microbial  
170 communities between different colonies (Hongoh et al., 2005, 2006; Benjamino  
171 and Graf, 2016), we analyzed four to eight replicate colonies per species.

172

## 173 **Results**

174 We used the Illumina MiSeq platform to sequence ~250 base pairs (bp) of the  
175 16S rRNA gene to cover the v4 region for bacterial community profiling of the gut  
176 microbiota. Protist communities were profiled using a set of 18S rRNA gene  
177 specific primers of our own design that targeted the parabasalid protists(see  
178 Materials and Methods). Oxymonads were excluded from the analysis because  
179 they are difficult to target (e.g. Heiss and Keeling, 2006) and escaped reliable  
180 illumina sequencing compatible amplification (data not shown). All termites were  
181 kept on *Pinus radiata* wood from the same source. After quality-filtering, our  
182 bacterial and parabasalid datasets contained 1 676 707 and 2 747 988 gene  
183 sequences respectively (Table S1).

184

### 185 Diversity of microbial communities

186 OTU (Operational Taxonomic Unit) based analysis of these sequences revealed  
187 that bacterial as well as parabasalid diversity was higher in the foraging species  
188 that we analyzed (Wilcoxon test on Shannon diversity:  $P = 0.005$ , and  $P = 0.03$   
189 respectively, Table 1). Rarefaction curves representing the microbial diversity in  
190 each termite species can be found in Supplementary Figure S1. Higher microbial  
191 diversity is expected in foraging species if we assume that species frequently  
192 leaving their nests to forage have a higher probability of encountering and  
193 acquiring new microorganisms.

194 Furthermore, the diversity of parabasalid protists and bacteria was  
195 correlated across termite species (Pearson's product - moment correlation  
196 coefficient:  $P = 0.003$ ,  $r^2 = 0.52$ , Figure 2). This correlation supports the notion  
197 that many bacteria present in the gut of lower termites are directly associated  
198 with protists. However, the bacterial diversity found in samples from the foraging  
199 *Reticulitermes* was higher than predicted by the regression from protist diversity  
200 of wood-dwelling species (ANOVA:  $P = 0.005$ , see Table S2 for linear models and  
201 tests performed). This suggests that a larger proportion of the bacterial diversity  
202 in *Reticulitermes* guts is either associated with oxymonads or does not live  
203 associated with protists when compared to wood-dwellers.

204 *Reticulitermes grassei* samples Rg2 and Rg4 as well as *P. simplex* sample  
205 Ps9 showed unusual bacterial diversity and community profiles (see discussion).  
206 We performed all diversity comparisons with and without these samples and  
207 found no qualitative difference in the results. Excluding these samples would  
208 increase average *R. grassei* bacterial community diversity, decrease *P. simplex*  
209 community diversity and lead to lower p-values in all tests shown in Table 1.

210

### 211 Composition of microbial communities

212 The correlation of bacterial and protist community diversity that we found  
213 suggests that many of the bacteria are associated with protists. Indeed,  
214 taxonomic classification of 16S rRNA gene sequences revealed many protist  
215 associated bacterial taxa (Figure 3A, B). The four most common bacterial phyla in  
216 our samples were *Bacteroidetes* (40.6%), *Spirochaetes* (21.9%), *Proteobacteria*  
217 (12.4%), and *Elusimicrobia* (9.1%). Of these phyla the *Bacteroidetes*,  
218 *Spirochaetes*, and *Elusimicrobia* contain members known to be important ecto- or  
219 endosymbionts of lower termite associated protists (Noda et al., 2005, 2006;  
220 Ohkuma, 2008; Strassert et al. 2010).



221 The phylum *Bacteroidetes*, contains the genus *Candidatus* *Armantifilum*,  
222 which was common in all *Cryptotermes* colonies (14.7 – 53.7%). *Candidatus*  
223 *Armantifilum* *devescovinae* is a filamentous bacterium that can be found  
224 attached to the surface of *Devescovina* (Lophomonadidae) flagellates and  
225 cospeciates with them in kalotermitids (Desai et al., 2010). Close relatives of  
226 *Candidatus* *Armantifilum* are associated with *Snyderella* *tabogae*  
227 (Lophomonadidae) in *Cryptotermes* *longicollis* (Desai and Brune, 2012).  
228 Accordingly, we found lophomonadids in all *Cryptotermes* colonies (Figure 3C).

229 *Elusimicrobia* are well known endosymbionts of many termite-gut  
230 flagellates (Ikeda-Ohtsubo et al., 2007; Brune, 2012). Sequences from a  
231 prominent member of the *Elusimicrobia*, *Endomicrobium* were detected in all  
232 samples (0.3 – 27.8%). *Endomicrobia* are endosymbionts of *Trichonympha* (Ikeda-  
233 Ohtsubo and Brune, 2009) which we found in *Reticulitermes* (8.7 – 51.3%). Other  
234 *Endomicrobia* are symbionts of the *Cristamonadida* (Desai et al., 2010), of which  
235 we found *Devescovina* (0.2 – 76.2%), *Stephanonympha* (0 – 75.0%) and *Foainia*-  
236 species (0.6 – 54.2%) in *Cryptotermes*. Interestingly, a small proportion of  
237 sequences from the *Endomicrobiaceae* were found in the colonies of *P. simplex*  
238 (0.4 – 3.0%). A protist host for *Endomicrobia* has not yet been described in *P.*  
239 *simplex* and Tai et al. (2015) found no evidence for *Endomicrobia* in *P. simplex*.  
240 However, our sampling of 16S rRNA gene sequences was 8-10 times deeper than  
241 that of Tai et al. (2015) providing more power to detect rare microbes. 2 724 of 3  
242 459 (86%) of the sequences from *Endomicrobia* found in *P. simplex* clustered into  
243 three OTUs (OTU 90, OTU 252, and OTU 316) that were specific to *P. simplex*.  
244 Hence, they are unlikely to represent contamination from non-*P. simplex* samples.  
245 These three OTUs are closely related and cluster phylogenetically with sequences  
246 from defaunated *R. santonensis* as well as a sequence from a *Zootermopsis*  
247 *nevadensis* flagellate suspension (Figure S2).

248 *Spirochaetes*, which are characteristic of termite guts, where they can be  
249 free living or live as ectosymbionts of protists (Breznak, 2002; Wenzel et al.,  
250 2003; Noda et al., 2003), were found in all samples (9.1 – 50.5%) except the  
251 abnormal sample Rg2.

252 Sequences from the spirochaete *Treponema la* fell into several distinct  
253 OTUs that were termite taxon specific (e.g. OTUs 2, 3, and 33, see S5). Many  
254 other bacterial genera contained termite taxon specific OTUs. For example,  
255 sequences from *Endomicrobium* fell into several taxon specific OTUs (7, 12, and  
256 20). *Candidatus* *Armantifilum* (OTUs 1, 31, and 48) separated into termite genus  
257 specific OTUs as well. The prevalence of host specific OTUs suggests that the  
258 microbial communities of the termite species analyzed here are distinct. At the  
259 same time, the relatedness of these OTUs from different termite taxa, as  
260 reflected by their common classification into a single genus, supports the notion  
261 that the members of these communities often share a phylogenetic history  
262 (Schauer et al., 2012; Dietrich et al., 2014).

263

#### 264 Analysis of microbial community differences and similarities

265 The phylogenetic relationship between bacteria from different termite species  
266 can be incorporated into community distances by analyzing environment specific  
267 phylogenetic branch lengths of all community members (Lozupone and Knight,  
268 2005). We were especially interested in the question whether similarities in  
269 microbial community composition reflect host diet and lifestyle. Assuming that  
270 microbes that are ecologically relevant for the host should not be rare, we used  
271 the weighted Unifrac metric (Lozupone et al., 2007) for our analysis.

272 The bacterial communities of the wood-dwelling species *C. domesticus*, *C.*  
273 *secundus* and *P. simplex* clustered separately from the bacterial communities of  
274 the foraging *Reticulitermes* (Figure 4A) and together with the bacterial  
275 communities of the wood-dwelling cockroach *Cryptocercus* (Figure S5), which is a

276 sister taxon of termites and also wood-dwelling. In contrast, the parabasalid  
277 protist communities clustered strictly according to termite host family (Figure 4B).  
278 Interestingly, the parabasalid communities of *R. flavipes* and *R. grassei* were  
279 distinct (Approximately Unbiased support = 93%), while there was no consistent  
280 difference between the protist communities of *C. secundus* and *C. domesticus*.  
281 This might in part be due to the high variability of protist communities within *C.*  
282 *domesticus*. The relative sequence abundance of the five most common  
283 protists in *C. domesticus* varied substantially (*Devescovina*: 0.4% -  
284 77.1%, *Stephanonympha*: 0.3% - 75.0%, *Foaina*: 0.6% - 39.0%,  
285 unclassified lophomonadid: 0.07% - 28.3%, unclassified parabasalid:  
286 1.4% - 23.3%). Samples Cd2 and Cd6 had similar protist communities that  
287 were somewhat distinct from the other *Cryptotermes*. These samples shared a  
288 very low relative abundance (1.7% and 1.4%) of an unclassified genus of the  
289 Gf10 symbiont group that is common in the other *Cryptotermes* samples (red in  
290 Figure 3C). They also share a high prevalence of *Stephanonympha* (62.8% and  
291 75.0%).

292

### 293 Bacteria specifically associated with foraging *Reticulitermes*

294 The clustering of foraging *Reticulitermes* bacterial communities suggests that  
295 there are bacteria specifically associated with *Reticulitermes*. In order to detect  
296 these bacteria, we used an Indicator Species Analysis (Dufrêne and Legendre,  
297 1997). Foraging *Reticulitermes* and wood-dwelling termites were treated as two  
298 different habitats and bacterial 97% identity OTUs as species. A full list of  
299 Indicator OTUs is available in Table S10.

300 *Reticulitermes* indicator OTUs that are more closely related to  
301 environmental bacteria or bacteria found in non-dictyopteran hosts than to OTUs  
302 found in *P. simplex* could be recently acquired by *Reticulitermes*. In order to shed  
303 light on which bacteria are closely related to *Reticulitermes* indicator OTUs, we

304 constructed a phylogenetic tree. This tree included representative sequences  
305 from the indicator OTUs, all OTUs for which we found at least 100 sequences in *P.*  
306 *simplex* or *Cryptotermes*, and all sequences in DictDB (Mikaelyan et al., 2015b)  
307 (Figure S4). The Newick formatted phylogeny can be found in S8.

308 Table 2 contains a list of *Reticulitermes* indicator OTUs that do not have *P.*  
309 *simplex* OTUs nor bacteria from other wood-dwellers amongst their closest  
310 relatives and contain more than 1 000 sequences. Close relatives of all of these  
311 indicator OTUs were found in association with *Reticulitermes* in previous studies,  
312 corroborating our results. Close relatives of several indicator OTUs came from the  
313 environment, non-dictyopteran hosts or other foraging termites.

314

## 315 **Discussion**

316 Profiling bacterial and parabasalid protist communities, we found (i) that protist  
317 and bacterial diversity correlate, (ii) evidence for changes in community  
318 composition and diversity that correlate with an evolutionary switch from wood-  
319 dwelling to foraging, (iii) candidate microbes that are specific to foraging  
320 *Reticulitermes*. Furthermore, we found several samples that showed unusual  
321 community profiles that require discussion.

322

### 323 Unusual community profiles and intraspecific variation in microbial communities

324 Three samples showed unusual community profiles (Ps9, Rg2, and Rg4). More  
325 than half of the sequences from Rg4 are comprised by OTU 16. OTU 16 was  
326 classified as a member of the Enterobacteriaceae. Many enterobacteria are insect  
327 pathogens (Grimont and Grimont, 2006; Galac and Lazzaro, 2011; Jurat-Fuentes  
328 and Jackson, 2012). Potential insect pathogens can often be found at low titers in  
329 natural host populations where they probably live as commensals (Staubach et  
330 al., 2013). This is also true for OTU 16 that comprises no more than 8% of the  
331 sequences in the other samples. However, these bacteria can reach high titers

332 when entering the hemolymph (Galac and Lazzaro, 2011) causing a systemic  
333 infection. This renders it plausible that Rg4 contained a termite that was  
334 systemically infected with OTU 16.

335         The bacterial communities of Rg2 and Ps9 contained a smaller fraction of  
336 sequences from presumably protist associated bacteria (*Endomicrobium* and  
337 *Candidatus* Azobacteroides) than their conspecifics (1.2% instead of 10.1 -  
338 27.4%, and 0.01% instead of 19.2% - 49.3%, respectively). This suggests that  
339 these samples might have had a lower protist titer. A low protist titer in termites  
340 is commonly caused by loss of protists from the hindgut during molts (Honigberg,  
341 1970). We selected individuals that had filled guts and carefully excluded  
342 individuals that were close to molting indicated by their whitish appearance.  
343 However, these samples might have contained termites that have not fully  
344 reestablished their protist communities after molting. Because we carefully  
345 selected the termites for our study, it appears unlikely that the overall high  
346 variability in the protist communities of *C. domesticus* is purely a result of  
347 undetected molts. The variance in community composition between conspecific  
348 termite colonies that we and others (Hongoh et al., 2005, 2006; Benjamino and  
349 Graf, 2016) observed suggests that the use of replicate colonies is important.

350

### 351 Bacterial and protist diversity

352 We presented, to our knowledge, the first report of a correlation between  
353 bacterial and protist community alpha diversity. Studies that analyze both, protist  
354 and bacterial communities in parallel, across termite species are still rare. In the  
355 two other studies, we are aware of, neither environmental nor dietary conditions  
356 were controlled (Tai et al., 2015; Rahman et al., 2015). As a consequence, the  
357 diversity patterns of termite associated microbial communities might have been  
358 affected by microbes merely passing through the gut. These passengers could  
359 have obscured the correlation of protist and bacterial diversity that we observed.

360 A correlation between protist and bacterial diversity does not only suggest  
361 that many bacteria are protist associated in the termite gut (Brugerolle and  
362 Radek, 2006). This correlation also implies a potential mechanism, how the high  
363 bacterial diversity in the termite gut (Colman et al., 2012; Jones et al., 2013) has  
364 evolved. A higher protist diversity offers bacteria a larger number of independent  
365 bacterial habitats that can be colonized. Because there is good evidence that the  
366 gut protists vertically transmit their bacterial symbionts (Noda et al., 2007; Ikeda-  
367 Ohtsubo and Brune, 2009; Desai et al., 2010) and can carry a single isolated  
368 strain of their symbionts (Ikeda-Ohtsubo et al., 2007; Zheng et al., 2015), these  
369 bacteria experience reduced gene flow that allows for the accumulation of  
370 genetic differences. Furthermore, the different environmental conditions, each  
371 protist species offers, exert selection pressures on their associated bacteria  
372 further promoting divergence via natural selection. In fact, the protists could  
373 serve as 'speciation reactors' for bacterial symbionts and facilitate the evolution  
374 of high bacterial diversity in termite guts. On the other hand, coadaptation  
375 between protists and bacteria could promote protist speciation (Dolan, 2001).

376 The bacterial diversity in the gut of *Reticulitermes* was higher than  
377 expected given parabasalid protist diversity of the other species. This implies  
378 that *Reticulitermes* carries either a higher proportion of oxymonad protist  
379 associated bacteria or more bacteria that live independently of protists. Because  
380 the proportion of oxymonad to parabasalid diversity is identical in *R. flavipes*  
381 (synonym *R. santonensis*) and *C. domesticus* (1:2, according to Yamin, (1979),  
382 non-protist associated bacteria are likely to contribute to the additional bacterial  
383 diversity in *Reticulitermes*.

384 Our bacterial diversity estimates for *Reticulitermes* are in concordance with  
385 estimates from Benjamino and Graf (2016) who sequenced the same fragment of  
386 the bacterial 16S rRNA gene. Their estimates of Shannon diversity range from  
387 3.54 to 4.48 for different colonies and fit our estimate of  $4.3 \pm 0.25$  well. A

388 previous study that reached a similar sequencing depth of an overlapping region  
389 of the 16S rRNA gene also estimated similar Shannon diversities for *R. flavipes* of  
390 3.92 (Dietrich et al., 2014). This is within one or two standard deviations of the  
391 diversity we calculated for *R. flavipes* and *R. grassei* (4.3+-0.25 and 3.72+-0.87,  
392 respectively). Rahman et al. (2015) estimated Shannon diversity of  
393 *Reticulitermes* to be somewhat higher (4.91-5.54). However, these authors  
394 included protists in their diversity estimates. In contrast, the bacterial diversity  
395 estimate in Tai et al. (2015) was lower with Shannon diversity for *R. flavipes* at  
396 3.66 versus 3.92 in our study, as well as 0.81 versus 3.14 for *P. simplex*. This  
397 difference could result from our ~10X increased sampling depth. Shannon  
398 diversity is known to correlate with sampling depth (Preheim et al., 2013).  
399 Furthermore, Tai et al. (2015) used a masking approach to remove variable  
400 regions from their alignment. This masking can significantly reduce diversity and  
401 resolution (Schloss, 2010). Because we used SILVA (Pruesse et al., 2007) based  
402 DictDB (Mikaelyan et al., 2015b) for our alignments instead of Greengenes  
403 (DeSantis et al., 2006) as in Tai et al. (2015), this masking is not necessary  
404 (Schloss, 2010). The same arguments can explain the lower parabasalid protist  
405 diversity in Tai et al. (2015) (0.5 for *R. flavipes* compared to 1.63 in our study and  
406 0.29 for *P. simplex* compared to 0.7 in our study). That our protist diversity  
407 estimates were higher than those obtained by visual inspection (Yamin, 1979) is  
408 not surprising since cryptic variation has been repeatedly documented from  
409 termite protists (Stingl and Brune 2003; Brugerolle and Bordereau, 2006; Zheng  
410 et al., 2015). Especially smaller protists often escape visual methods (Radek et  
411 al., 2014).

412

413 Bacterial communities cluster according to lifestyle while protist communities  
414 cluster according to host phylogeny



415 As a consequence of the switch from the ancestral wood-dwelling lifestyle to  
416 foraging, *Reticulitermes* are not only exposed to more diverse microbial  
417 communities from outside the nest, but also experienced a change to a more  
418 diverse diet. *Reticulitermes* probably originated in inland habitats (Dedeine et al.,  
419 2016) where they feed on a variety of substrates (Waller, 1991). Their natural  
420 substrates include decaying wood (Amburgey, 1979), horse dung (Rahman et al.,  
421 2015), and they are even able to acquire nutrients from soil (Janzow and Judd,  
422 2015). In contrast, *C. domesticus*, *C. secundus* and *P. simplex* are largely  
423 restricted to islands and coastal regions where they dwell on dead wood  
424 (Eggleton, 2000). These changes in lifestyle and diet align with a change of  
425 bacterial communities, but not protist communities. Therefore, microbes that are  
426 related to this change in lifestyle are more likely to be found amongst the  
427 bacteria. This result adds to the notion that bacterial communities are more  
428 variable over evolutionary time than protist communities (Noda et al., 2009; Tai  
429 et al., 2015).

430 A higher propensity of random gain and loss of bacteria in *Reticulitermes*  
431 that is fueled by exposure of foragers to more diverse microbes could leave the  
432 bacterial community of *Reticulitermes* distinct from that of wood-dwellers.  
433 However, *Prorhinotermes* have probably reverted back from foraging to wood-  
434 dwelling (Legendre et al. 2008, Bourgignon et al. 2015) leaving its ancestors  
435 exposed to similarly diverse microbes, and *Prorhinotermes* with a similar  
436 propensity for random change of microbial communities. Given similar potential  
437 for random change, invoking lifestyle related natural selection either driving the  
438 divergence of the *Reticulitermes* microbiota, or the convergence of the  
439 *Prorhinotermes* microbiota back to that of wood-dwelling species, or both,  
440 appears plausible to explain the distinct bacterial communities of *Reticulitermes*.  
441 Candidate bacteria that correlate with the change in lifestyle



442 DictDB (Mikaelyan et al., 2015b) allowed us to classify the majority (75.5%) of our  
443 bacterial sequences to the genus level and identify bacteria that correlate with  
444 the evolutionary switch in lifestyle from wood-dwelling to foraging in  
445 *Reticulitermes*. These bacteria come from diverse families. OTU 120 is a  
446 spirochaete from the genus *Treponema* I. Spirochaetes including *Treponema* I  
447 strongly correlate with diet in higher termites (Mikaelyan et al., 2015a;  
448 Rossmassler et al., 2015). Indicator OTU 307 was classified as *Stenoxybacter*.  
449 *Stenoxybacter* colonizes the hind gut wall of *R. flavipes* and contributes to  
450 acetate metabolism as well as oxygen consumption (Wertz and Breznak, 2007).  
451 Another interesting candidate is OTU 58 (*Lactococcus*). The genus *Lactococcus*  
452 has, amongst termites, so far only been reported from *Reticulitermes* and higher  
453 termites (Bauer et al., 1999; König et al., 2006; Mathew et al., 2012; Boucias et  
454 al., 2013; Yang et al., 2015). Lactococci are powerful probiotics in mammals  
455 (Ballal et al., 2015), fish (Heo et al., 2013) and arthropods (Maeda et al., 2013).  
456 The acquisition of probiotics would be an obvious evolutionary response to the  
457 increased pathogen exposure that is connected to the foraging lifestyle.  
458 Furthermore, *Lactococcus* might be metabolically important in *R. flavipes* as it  
459 directly or indirectly contributes to acetate production in termite guts (Bauer et  
460 al., 1999).

461

## 462 **Conclusion**

463 We provide evidence that, even after removal of environmental noise through  
464 keeping different lower termite species under common conditions, an ecological  
465 imprint on their associate bacterial communities remains. Studies that control the  
466 termite environment include more species and span several evolutionary  
467 switches in lifestyle are necessary to generalize this pattern.

468

## 469 **Acknowledgements**

470 We thank Jan Sobotnik for kindly providing *P. simplex* colonies and Andreas Brune  
471 for access to a pre-publication version of DictDB that made our life much easier.  
472 We thank Chris Voolstra and Volker Nehring for helpful comments on the  
473 manuscript. This work was funded by DFG grants STA1154/2-1 and K01895/6-4.

474

## 475 **Materials and Methods**

### 476 Termite samples

477 All termites used in the experiments were kept under constant conditions (27°C,  
478 70% humidity) and acclimated to the same food substrate (*Pinus radiata* wood) in  
479 our lab for at least six weeks prior to the experiment. This period is considered  
480 sufficient for termites and their gut microbes to adjust to a new diet (Huang et  
481 al., 2013) and lies far beyond the 24h passage time of food through the termite  
482 gut (Breznak, 1984). *C. domesticus* and *C. secundus* were collected in Darwin (in  
483 2003, 2007 and 2011), Australia. *P. simplex* was collected in Soroa, Cuba (in  
484 1964), and colonies of *R. flavipes* as well as *R. grassei* were collected on the Île d'  
485 Oléron, France (in 2014). Morphological species identification was confirmed by  
486 sequencing of the mitochondrial cytochrome c oxidase subunit II (Figure S6 and  
487 supplementary methods) for most of the samples. The foraging species *R.*  
488 *flavipes* and *R. grassei* were additionally provided with sand to build their nests.  
489 In order to exclude a contribution of microbes or microbial DNA in the sand to the  
490 *Reticulitermes* associated microbiota, we applied the same DNA extraction,  
491 amplification, and sequencing procedure as for the termite guts to the sand.  
492 However, we failed to amplify the targeted fragments from the sand samples.  
493 This led us to conclude that the sand did not contribute to the bacterial nor  
494 protist community profiles.

495 In order to test whether the time since collection from the wild played a  
496 role in diversity and composition of the microbial communities we analyzed the  
497 microbial communities of *Cryptotermes* that have been in the lab for different

498 periods of time (2004 - 2012). We could not detect any effect of the time under  
499 lab conditions on microbial community alpha diversity (bacteria:  $P = 0.99$ ,  $r =$   
500  $0.001$ ; protists:  $P = 0.13$ ,  $r^2 = 0.21$ ) nor composition and beta diversity  
501 (Supplementary Figure S3).

502

### 503 DNA extraction, primer design and library preparation

504 DNA was extracted from the guts of three workers per colony using bead beating  
505 and chloroform precipitation (also see supplementary material and methods). We  
506 amplified the v4 region of the 16S rRNA gene with the bacteria specific primerset  
507 515f (5'-GTGCCAGCMGCCGCGGTAA-3') and 806r (5'-  
508 GGACTACHVGGGTWTCTAAT-3') developed by Caporaso *et al.* (2012). Specific  
509 barcode combinations were added to the primer sequences following Kozich *et al.*  
510 (2013). In order to amplify a region of the 18S rRNA gene of parabasalid protists,  
511 we developed custom designed primers. Primer development was based on  
512 parabasalid sequences from SILVA SSU Ref Nr 123 that was extended by 18S  
513 rRNA gene sequences from protist taxa that we expected to occur in the termite  
514 species we analyzed according to Yamin (1979). These additional sequences were  
515 downloaded from ncbi and aligned using ClustalW (Larkin *et al.*, 2007) in the  
516 BioEdit Sequence Alignment Editor version 7.2.5 (Hall, 1999). The resulting  
517 alignment was manually curated and searched for potential forward and reverse  
518 primers that would match as many protist sequences as possible but not termite  
519 18S rRNA genes. The 18S rRNA gene alignment as well as the corresponding  
520 taxonomy reference - file are provided in the supplement (S7). The resulting  
521 primerset Par18SF: 5'-AAACTGCGAATAGCTC-3'; Par18SR: 5'-  
522 CTCTCAGGCGCCTTCTCCGGCAGT-3', amplified ~250 bp. A detailed PCR protocol  
523 can be found in the supplementary material and methods section. Libraries were  
524 sequenced on an Illumina MiSeq reading 2x 250bp.

525

## 526 Analysis

527 Data analysis was performed using MOTHUR version 1.33.3 (Schloss et al., 2009),  
528 following the MiSeq SOP. Our detailed MOTHUR script can be found in S9. For  
529 taxonomic classification of the bacterial 16S OTUs a representative sequence of  
530 each OTU was aligned to a termite specific database DictDb\_v3 (Mikaelyan et al.,  
531 2015b), while 18S protist OTUs were aligned and classified using all parabasalid  
532 sequences from the SILVA SSU Ref Nr 123 database that was extended by our  
533 custom made alignment and taxonomy reference file (S7). In order to avoid  
534 coverage bias, bacterial and protist datasets were rarefied resulting in 32 824  
535 and 22 285 sequences per sample, respectively. Statistical tests and data  
536 visualization were performed in R version 3.1.2 (2012). Phylogenetic trees  
537 necessary to apply UniFrac (Lozupone et al., 2007) as well as the trees including  
538 OTU representative sequences were generated with FastTree version 2.1.7 (Price  
539 et al., 2010). The resulting trees were visualized with Dendroscope 3.3.4 (Huson  
540 and Scornavacca, 2012). Trees based on Unifrac were generated using the  
541 UPGMA algorithm as implemented in the R PvClust package version 2.0.0 (Suzuki  
542 and Shimodaira, 2015) and bootstrapped 10 000 times with standard settings.  
543 Indicator species were obtained following the method by (Dufrêne and Legendre,  
544 1997), as included in MOTHUR.

545

## 546 **Data availability**

547 Sequence data is available at MGRAST (<http://metagenomics.anl.gov/>) under the  
548 IDs 4711469.3 - 4711607.3. Supplementary information is available at the  
549 journal website.

550

## 551 **References**

Abe T. (1987). Evolution of life types in termites. In: Kawano S, Connell JH, Hidaka T (eds). Evolution and coadaptation in biotic communities. University of Tokyo Press, pp 125–146.

Amburgey TL. (1979). Review and checklist of the literature on interactions between wood-inhabiting fungi and subterranean termites: 1960-1978. *Sociobiology* **4**: 279–296.

Ballal SA, Veiga P, Fenn K, Michaud M, Kim JH, Gallini CA, et al. (2015). Host lysozyme-mediated lysis of *Lactococcus lactis* facilitates delivery of colitis-attenuating superoxide dismutase to inflamed colons. *Proc Natl Acad Sci USA* **112**: 7803–7808.

Bauer S, Tholen A, Overmann J, Brune A. (1999). Characterization of abundance and diversity of lactic acid bacteria in the hindgut of wood- and soil-feeding termites by molecular and culture-dependent techniques. *Arch Microbiol* **173**: 126–137.

Benjamino J, Graf J. (2016). Characterization of the core and caste-specific microbiota in the termite, *Reticulitermes flavipes*. *Front Microbiol* **7**. e-pub ahead of print, doi: 10.3389/fmicb.2016.00171.

Boucias DG, Cai Y, Sun Y, Lietze V-U, Sen R, Raychoudhury R, et al. (2013). The hindgut lumen prokaryotic microbiota of the termite *Reticulitermes flavipes* and its responses to dietary lignocellulose composition. *Mol Ecol* **22**: 1836–1853.

Breznak JA. (1984). Biochemical aspects of symbiosis between termites and their intestinal microbiota. In: Anderson JM (ed). *Invertebrate - Microbial Interaction*. Cambridge University Press: Cambridge, pp 173–203.

Breznak JA. (2002). Phylogenetic diversity and physiology of termite gut spirochetes. *Integr Comp Biol* **42**: 313–318.

Breznak JA, Brill WJ, Mertins JW, Coppel HC. (1973). Nitrogen fixation in termites. *Nature* **244**: 577–580.

Brugerolle G, Bordereau C. (2006). Immunological and ultrastructural characterization of spirotrichonymphid flagellates from *Reticulitermes grassei* and *R. flavipes* (syn. *R. santonensis*), with special reference to *Spirotrichonympha*, *Spironympha* and *Microjoenia*. *Org Divers Evol* **6**: 109–123.

Brugerolle G, Radek R. (2006). Symbiotic protozoa of termites. In: König H, Varma A (eds). *Intestinal microorganisms of termites and other invertebrates*. Springer Berlin: Heidelberg, pp 243–269.

Brune A. (2012). Endomicrobia: intracellular symbionts of termite gut flagellates. *Endocytobiosis Cell Res* **23**: 11–15.

Brune A, Dietrich C. (2015). The gut microbiota of termites: digesting the diversity in the light of ecology and evolution. *Annu Rev Microbiol* **69**: 145–166.

Caporaso JG, Lauber CL, Walters WA, Berg-Lyons D, Huntley J, Fierer N, et al. (2012). Ultra-high-throughput microbial community analysis on the Illumina HiSeq and MiSeq platforms. *ISME J* **6**: 1621–1624.

Cleveland LR. (1923). Symbiosis between termites and their intestinal protozoa. *Proc Natl Acad Sci USA* **9**: 424.

Cleveland LR. (1925). The effects of oxygenation and starvation on the symbiosis between the termite, *Termopsis*, and its intestinal flagellates. *Biol Bull* **48**: 309.

Colman DR, Toolson EC, Takacs-Vesbach CD. (2012). Do diet and taxonomy influence insect gut bacterial communities? *Mol Ecol* **21**: 5124–5137.

Dedeine F, Dupont S, Guyot S, Matsuura K, Wang C, Habibpour B, et al. (2016). Historical biogeography of *Reticulitermes* termites (Isoptera: Rhinotermitidae)

inferred from analyses of mitochondrial and nuclear loci. *Mol Phylogenet Evol* **94**: 778–790.

Desai MS, Brune A. (2012). Bacteroidales ectosymbionts of gut flagellates shape the nitrogen-fixing community in dry-wood termites. *ISME J* **6**: 1302–1313.

Desai MS, Strassert JFH, Meuser K, Hertel H, Ikeda-Ohtsubo W, Radek R, et al. (2010). Strict cospeciation of devescovininid flagellates and Bacteroidales ectosymbionts in the gut of dry-wood termites (Kalotermitidae). *Environ Microbiol* **12**: 2120–2132.

DeSantis TZ, Hugenholtz P, Larsen N, Rojas M, Brodie EL, Keller K, et al. (2006). Greengenes, a chimera-checked 16S rRNA gene database and workbench compatible with ARB. *Appl Environ Microbiol* **72**: 5069–5072.

Dietrich C, Köhler T, Brune A. (2014). The cockroach origin of the termite gut microbiota: patterns in bacterial community structure reflect major evolutionary events. *Appl Environ Microbiol* **80**: 2261–2269.

Dolan MF. (2001). Speciation of termite gut protists: the role of bacterial symbionts. *Int Microbiol* **4**: 203–208.

Donovan SE, Eggleton P, Bignell DE. (2001). Gut content analysis and a new feeding group classification of termites. *Ecol Entomol* **26**: 356–366.

Douglas AE. (2015). Multiorganismal insects: diversity and function of resident microorganisms. *Annu Rev Entomol* **60**: 17–34.

Dufrêne M, Legendre P. (1997). Species assemblages and indicator species: the need for a flexible asymmetrical approach. *Ecol Monogr* **67**: 345–366.

Eggleton P. (2000). Global patterns of termite diversity. In: Abe T, Bignell DE, Higashi M (eds). *Termites: evolution, sociality, symbiosis and ecology*. Kluwer Academic Publishers: Netherlands, pp 25–51.

Eggleton P, Tayasu I. (2001). Feeding groups, lifetypes and the global ecology of termites. *Ecol Res* **16**: 941–960.

Feldhaar H. (2011). Bacterial symbionts as mediators of ecologically important traits of insect hosts. *Ecol Entomol* **36**: 533–543.

Galac MR, Lazzaro BP. (2011). Comparative pathology of bacteria in the genus *Providencia* to a natural host, *Drosophila melanogaster*. *Microbes Infect* **13**: 673–683.

Grimont F, Grimont PAD. (2006). The Genus *Serratia*. In: Dworkin M, Falkow S, Rosenberg E, Schleifer K-H, Stackebrandt E (eds). *The Prokaryotes*. Springer New York, pp 219–244.

Hall T. (1999). BioEdit: a user-friendly biological sequence alignment editor and analysis program for Windows 95/98/NT. *Nucleic Acids Symp Ser* **41**: 95–98.

Heiss AA, Keeling PJ. (2006). The Phylogenetic Position of the Oxymonad *Saccinobaculus* Based on SSU rRNA. *Protist* **157**: 335–344.

Heo W-S, Kim Y-R, Kim E-Y, Bai SC, Kong I-S. (2013). Effects of dietary probiotic, *Lactococcus lactis* subsp. *lactis* I2, supplementation on the growth and immune response of olive flounder (*Paralichthys olivaceus*). *Aquaculture* **376–379**: 20–24.

He S, Ivanova N, Kirton E, Allgaier M, Bergin C, Scheffrahn RH, et al. (2013). Comparative metagenomic and metatranscriptomic analysis of hindgut paunch microbiota in wood- and dung-feeding higher termites. *PLoS ONE* **8**: e61126.



Hongoh Y, Deevong P, Inoue T, Moriya S, Trakulnaleamsai S, Ohkuma M, et al. (2005). Intra- and interspecific comparisons of bacterial diversity and community structure support coevolution of gut microbiota and termite host. *Appl Environ Microbiol* **71**: 6590–6599.

Hongoh Y, Ekpornprasit L, Inoue T, Moriya S, Trakulnaleamsai S, Ohkuma M, et al. (2006). Intracolony variation of bacterial gut microbiota among castes and ages in the fungus-growing termite *Macrotermes gilvus*. *Mol Ecol* **15**: 505–516.

Hongoh Y, Sharma VK, Prakash T, Noda S, Taylor TD, Kudo T, et al. (2008a). Complete genome of the uncultured Termite Group 1 bacteria in a single host protist cell. *Proc Natl Acad Sci USA* **105**: 5555–5560.

Hongoh Y, Sharma VK, Prakash T, Noda S, Toh H, Taylor TD, et al. (2008b). Genome of an endosymbiont coupling N<sub>2</sub> fixation to cellulolysis within protist cells in termite gut. *Science* **322**: 1108–1109.

Honigberg BM. (1970). Protozoa Associated with Termites and Their Role in Digestion. In: Krishna K, Weesner FM (eds) Vol. II. *Biology of termites*. Academic Press: New York, pp 1–32.

Huang X-F, Bakker MG, Judd TM, Reardon KF, Vivanco JM. (2013). Variations in diversity and richness of gut bacterial communities of termites (*Reticulitermes flavipes*) fed with grassy and woody plant substrates. *Microb Ecol* **65**: 531–536.

Huson DH, Scornavacca C. (2012). Dendroscope 3: An interactive tool for rooted phylogenetic trees and networks. *Syst Biol* **61**: 1061–1067.

Ikeda-Ohtsubo W, Brune A. (2009). Cospeciation of termite gut flagellates and their bacterial endosymbionts: *Trichonympha* species and 'Candidatus Endomicrobium trichonymphae'. *Mol Ecol* **18**: 332–342.

Ikeda-Ohtsubo W, Desai M, Stingl U, Brune A. (2007). Phylogenetic diversity of 'Endomicrobia' and their specific affiliation with termite gut flagellates. *Microbiology* **153**: 3458–3465.

Janzow MP, Judd TM. (2015). The termite *Reticulitermes flavipes* (Rhinotermitidae: Isoptera) can acquire micronutrients from soil. *Environ Entomol* **44**: 814–820.

Jones RT, Sanchez LG, Fierer N. (2013). A cross-taxon analysis of insect-associated bacterial diversity. *PLoS ONE* **8**: e61218.

Jurat-Fuentes JL, Jackson TA. (2012). Bacterial Entomopathogens. In: Vega FE, Kaya HK (eds). *Insect pathology* (Second Edition). Academic Press: San Diego, pp 265–349.

Kaltenpoth M, Göttler W, Herzner G, Strohm E. (2005). Symbiotic bacteria protect wasp larvae from fungal infestation. *Curr Biol* **15**: 475–479.

König H, Froehlich J, Hertel H. (2006). Diversity and lignocellulytic activities of cultured microorganisms. In: König H, Varma A (eds). *Intestinal Microorganisms of Termites and Other Invertebrates*. Springer Science & Business Media, pp 277–302.

Korb J, Buschmann M, Schafberg S, Liebig J, Bagnères A-G. (2012). Brood care and social evolution in termites. *Proc R Soc B Biol Sci* **279**: 2662–2671.

Korb J, Poulsen M, Hu H, Li C, Boomsma JJ, Zhang G, et al. (2015). A genomic comparison of two termites with different social complexity. *Front Genet* **6**. doi: 10.3389/fgene.2015.00009.

Kozich JJ, Westcott SL, Baxter NT, Highlander SK, Schloss PD. (2013). Development of a dual-index sequencing strategy and curation pipeline for

analyzing amplicon sequence data on the MiSeq Illumina sequencing platform.  
Appl Environ Microbiol AEM.01043–13.

Larkin MA, Blackshields G, Brown NP, Chenna R, McGettigan PA, McWilliam H, et al. (2007). Clustal W and Clustal X version 2.0. *Bioinformatics* **23**: 2947–2948.

Legendre F, Whiting MF, Bordereau C, Canello EM, Evans TA, Grandcolas P. (2008). The phylogeny of termites (Dictyoptera: Isoptera) based on mitochondrial and nuclear markers: Implications for the evolution of the worker and pseudergate castes, and foraging behaviors. *Mol Phylogenet Evol* **48**: 615–627.  
Lozupone CA, Hamady M, Kelley ST, Knight R. (2007). Quantitative and qualitative  $\beta$  diversity measures lead to different insights into factors that structure microbial communities. *Appl Environ Microbiol* **73**: 1576–1585.

Lozupone C, Knight R. (2005). UniFrac: a new phylogenetic method for comparing microbial communities. *Appl Environ Microbiol* **71**: 8228–8235.

Maeda M, Shibata A, Biswas G, Korenaga H, Kono T, Itami T, et al. (2013). Isolation of lactic acid bacteria from kuruma shrimp (*Marsupenaeus japonicus*) intestine and assessment of immunomodulatory role of a selected strain as probiotic. *Mar Biotechnol* **16**: 181–192.

Mathew GM, Ju Y-M, Lai C-Y, Mathew DC, Huang CC. (2012). Microbial community analysis in the termite gut and fungus comb of *Odontotermes formosanus*: the implication of *Bacillus* as mutualists. *FEMS Microbiol Ecol* **79**: 504–517.

McFall-Ngai M, Hadfield MG, Bosch TCG, Carey HV, Domazet-Lošo T, Douglas AE, et al. (2013). Animals in a bacterial world, a new imperative for the life sciences. *Proc Natl Acad Sci USA* **110**: 3229–3236.

McFall-Ngai M, Heath-Heckman EAC, Gillette AA, Peyer SM, Harvie EA. (2012). The secret languages of coevolved symbioses: Insights from the *Euprymna scolopes-Vibrio fischeri* symbiosis. *Semin Immunol* **24**: 3–8.

Mikaelyan A, Dietrich C, Köhler T, Poulsen M, Sillam-Dussès D, Brune A. (2015a). Diet is the primary determinant of bacterial community structure in the guts of higher termites. *Mol Ecol* **24**: 5284–5295.

Mikaelyan A, Köhler T, Lampert N, Rohland J, Boga H, Meuser K, et al. (2015b). Classifying the bacterial gut microbiota of termites and cockroaches: A curated phylogenetic reference database (DictDb). *Syst Appl Microbiol* **38**: 472–482.

Noda S, Hongoh Y, Sato T, Ohkuma M. (2009). Complex coevolutionary history of symbiotic Bacteroidales bacteria of various protists in the gut of termites. *BMC Evol Biol* **9**: 158.

Noda S, Iida T, Kitade O, Nakajima H, Kudo T, Ohkuma M. (2005). Endosymbiotic Bacteroidales bacteria of the flagellated protist *Pseudotriconympha grassii* in the gut of the termite *Coptotermes formosanus*. *Appl Environ Microbiol* **71**: 8811–8817.

Noda S, Inoue T, Hongoh Y, Kawai M, Nalepa CA, Vongkaluang C, et al. (2006). Identification and characterization of ectosymbionts of distinct lineages in Bacteroidales attached to flagellated protists in the gut of termites and a wood-feeding cockroach. *Environ Microbiol* **8**: 11–20.

Noda S, Kitade O, Inoue T, Kawai M, Kanuka M, Hiroshima K, et al. (2007). Cospeciation in the triplex symbiosis of termite gut protists (*Pseudotriconympha spp.*), their hosts, and their bacterial endosymbionts. *Mol Ecol* **16**: 1257–1266.

Noda S, Ohkuma M, Yamada A, Hongoh Y, Kudo T. (2003). Phylogenetic position and *in situ* identification of ectosymbiotic spirochetes on protists in the termite gut. *Appl Environ Microbiol* **69**: 625–633.

Ohkuma M. (2008). Symbioses of flagellates and prokaryotes in the gut of lower termites. *Trends Microbiol* **16**: 345–352.

Ohkuma M, Noda S, Hattori S, Iida T, Yuki M, Starns D, et al. (2015). Acetogenesis from H<sub>2</sub> plus CO<sub>2</sub> and nitrogen fixation by an endosymbiotic spirochete of a termite-gut cellulolytic protist. *Proc Natl Acad Sci USA* **112**: 10224–10230.

Ohkuma M, Noda S, Hongoh Y, Nalepa CA, Inoue T. (2009). Inheritance and diversification of symbiotic trichonymphid flagellates from a common ancestor of termites and the cockroach *Cryptocercus*. *Proc R Soc B Biol Sci* **276**: 239–245.

Preheim SP, Perrotta AR, Friedman J, Smilie C, Brito I, Smith MB, et al. (2013). Computational methods for high-throughput comparative analyses of natural microbial communities. In: DeLong EF (ed) *Microbial Metagenomics, Metatranscriptomics, and Metaproteomics* Vol. 531. *Methods in Enzymology*. Academic Press, pp 353–370.

Price MN, Dehal PS, Arkin AP. (2010). FastTree 2 – approximately maximum-likelihood trees for large alignments. *PLoS ONE* **5**: e9490.

Pruesse E, Quast C, Knittel K, Fuchs BM, Ludwig W, Peplies J, et al. (2007). SILVA: a comprehensive online resource for quality checked and aligned ribosomal RNA sequence data compatible with ARB. *Nucleic Acids Res* **35**: 7188–7196.

Radek R, Strassert JFH, Krüger J, Meuser K, Scheffrahn RH, Brune A. (2014). Phylogeny and ultrastructure of *Oxymonas jouteli*, a rostellum-free species, and *Opisthomitus longiflagellatus* sp. nov., oxymonadid flagellates from the gut of *Neotermes jouteli*. *Protist* **165**: 384–399.

Rahman NA, Parks DH, Willner DL, Engelbrektson AL, Goffredi SK, Warnecke F, et al. (2015). A molecular survey of Australian and North American termite genera indicates that vertical inheritance is the primary force shaping termite gut microbiomes. *Microbiome* **3**: 5.

Rosengaus RB, Moustakas JE, Calleri DV, Traniello JFA. (2003). Nesting ecology and cuticular microbial loads in dampwood (*Zootermopsis angusticollis*) and drywood termites (*Incisitermes minor*, *I. schwarzi*, *Cryptotermes cavifrons*). *J Insect Sci* **3**: 6pp

Rosengaus RB, Traniello JFA, Bulmer MS. (2011). Ecology, behavior and evolution of disease resistance in termites. In: Bignell DE, Roisin Y (eds). *Biology of Termites: A Modern Synthesis*. pp 165–192. Rossmassler K, Dietrich C, Thompson C, Mikaelyan A, Nonoh JO, Scheffrahn RH, et al. (2015). Metagenomic analysis of the microbiota in the highly compartmented hindguts of six wood- or soil-feeding higher termites. *Microbiome* **3**: 56.

Scharf ME. (2015). Termites as targets and models for biotechnology. *Annu Rev Entomol* **60**: 77–102.

Schauer C, Thompson CL, Brune A. (2012). The bacterial community in the gut of the cockroach *Shelfordella lateralis* reflects the close evolutionary relatedness of cockroaches and termites. *Appl Environ Microbiol* **78**: 2758–2767.

Schloss PD. (2010). The effects of alignment quality, distance calculation method, sequence filtering, and region on the analysis of 16S rRNA gene-based studies. *PLoS Comput Biol* **6**: e1000844.

Schloss PD, Westcott SL, Ryabin T, Hall JR, Hartmann M, Hollister EB, et al. (2009). Introducing mothur: open-Source, Platform-Independent, community-supported

software for describing and comparing microbial communities. *Appl Environ Microbiol* **75**: 7537–7541.

Staubach F, Baines JF, Künzel S, Bik EM, Petrov DA. (2013). Host species and environmental effects on bacterial communities associated with *Drosophila* in the laboratory and in the natural environment. *PLoS ONE* **8**: e70749.

Stingl U, Brune A. (2003). Phylogenetic Diversity and Whole-Cell Hybridization of Oxymonad Flagellates from the Hindgut of the Wood-Feeding Lower Termite *Reticulitermes flavipes*. *Protist* **154**: 147–155.

Strassert JFH, Desai MS, Radek R, Brune A. (2010). Identification and localization of the multiple bacterial symbionts of the termite gut flagellate *Joenia annectens*. *Microbiology* **156**: 2068–2079.

Suzuki R, Shimodaira H. (2015). Pvcust: hierarchical clustering with p-values via multiscale bootstrap resampling. R package version 2.0-0. <http://CRAN.R-project.org/package=pvcust>.

Tai V, James ER, Nalepa CA, Scheffrahn RH, Perlman SJ, Keeling PJ. (2015). The role of host phylogeny varies in shaping microbial diversity in the hindguts of lower termites. *Appl Environ Microbiol* **81**: 1059–1070.

Vieira FCS, Nahas E. (2005). Comparison of microbial numbers in soils by using various culture media and temperatures. *Microbiol Res* **160**: 197–202.

Waller DA. (1991). Feeding by *Reticulitermes spp.* *Sociobiology* **19**: 91–99.

Wang J, Kalyan S, Steck N, Turner LM, Harr B, Künzel S, et al. (2015). Analysis of intestinal microbiota in hybrid house mice reveals evolutionary divergence in a vertebrate hologenome. *Nat Commun* **6**: 6440.

Warnecke F, Luginbühl P, Ivanova N, Ghassemian M, Richardson TH, Stege JT, et al. (2007). Metagenomic and functional analysis of hindgut microbiota of a wood-feeding higher termite. *Nature* **450**: 560–565.

Wenzel M, Radek R, Brugerolle G, König H. (2003). Identification of the ectosymbiotic bacteria of *Mixotricha paradoxa* involved in movement symbiosis. *Eur J Protistol* **39**: 11–23.

Wertz JT, Breznak JA. (2007). Physiological ecology of *Stenoxybacter acetivorans*, an obligate microaerophile in termite guts. *Appl Environ Microbiol* **73**: 6829–6841.

Yamin M A. (1979). Flagellates of the orders Trichomonadida Kirby, Oxymonadida Grasse', and Hypermastigida Grassi & Foà reported from lower termites (Isoptera families Mastotermitidae, Kalotermitidae, Hodotermitidae, Termopsidae, Rhinotermitidae, and Serritermitidae) and from the wood-feeding roach *Cryptocercus* (Dictyoptera: Cryptocercidae). *Sociobiology* **4**: 5–119.

Yang SY, Zheng Y, Wang XM, Huang Z, Yang H. (2015). *Lactococcus nasutitermitis* sp. nov. isolated from a termite gut. *Int J Syst Evol Microbiol*. 66(1):518-522

Zhang X, Leadbetter JR. (2012). Evidence for cascades of perturbation and adaptation in the metabolic genes of higher termite gut symbionts. *mBio* **3**: e00223–12.

Zheng H, Dietrich C, Thompson CL, Meuser K, Brune A. (2015). Population structure of endomicrobia in single host cells of termite gut flagellates (*Trichonympha spp.*). *Microbes Environ* **30**: 92–98.

Zilber-Rosenberg I, Rosenberg E. (2008). Role of microorganisms in the evolution of animals and plants: the hologenome theory of evolution. *FEMS Microbiol Rev* **32**: 723–735.



552  
553  
554  
555  
556  
557  
558  
559  
560  
561  
562  
563  
564  
565

**Figures and tables**

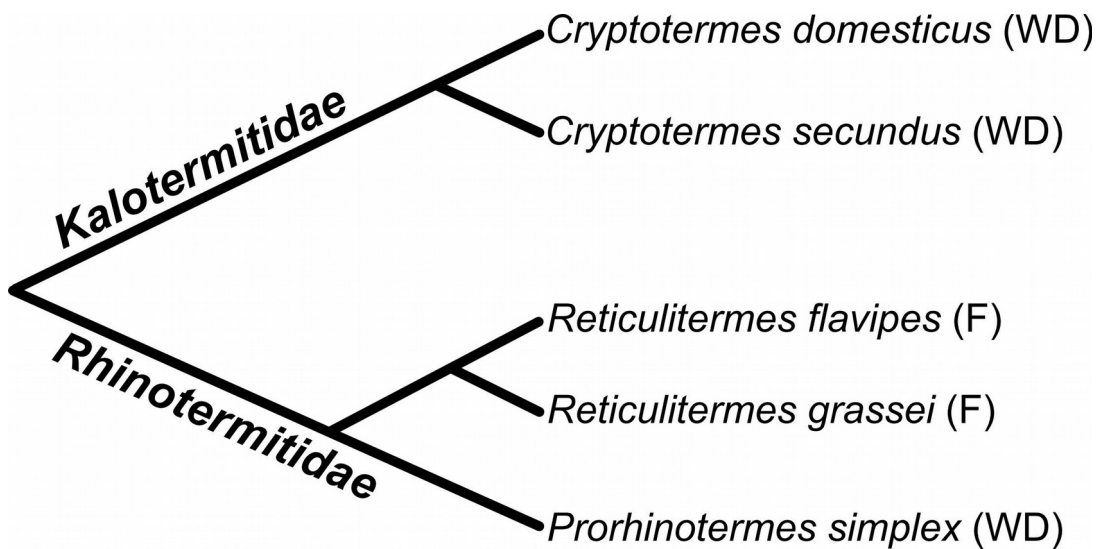

566  
567  
568  
569  
570

**Figure 1: Schematic phylogeny of the five lower termite species analyzed in this study.** Letter in ( ) describes host lifestyle. Branch lengths not drawn to scale. WD = wood-dweller; F = forager. See also Figure S6 for a cytochrome c oxidase sequence based tree.

571

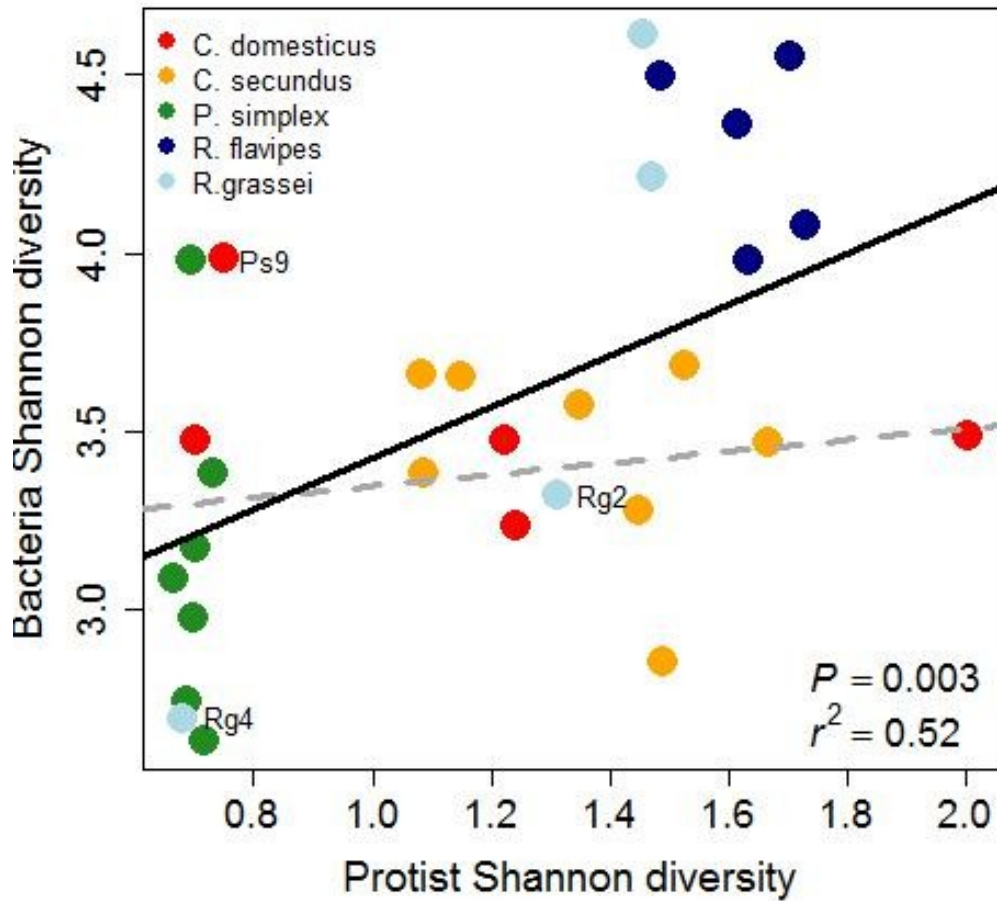

572

573 **Figure 2: The Shannon diversities of protists and bacteria are**  
574 **correlated across species.** Each dot represents a termite colony. The solid  
575 regression line is based on all samples, while the dashed line is based on wood-  
576 dwellers only. Colonies with unusual diversity patterns were marked (Ps9, Rg2,  
577 and Rg4, see discussion).

578

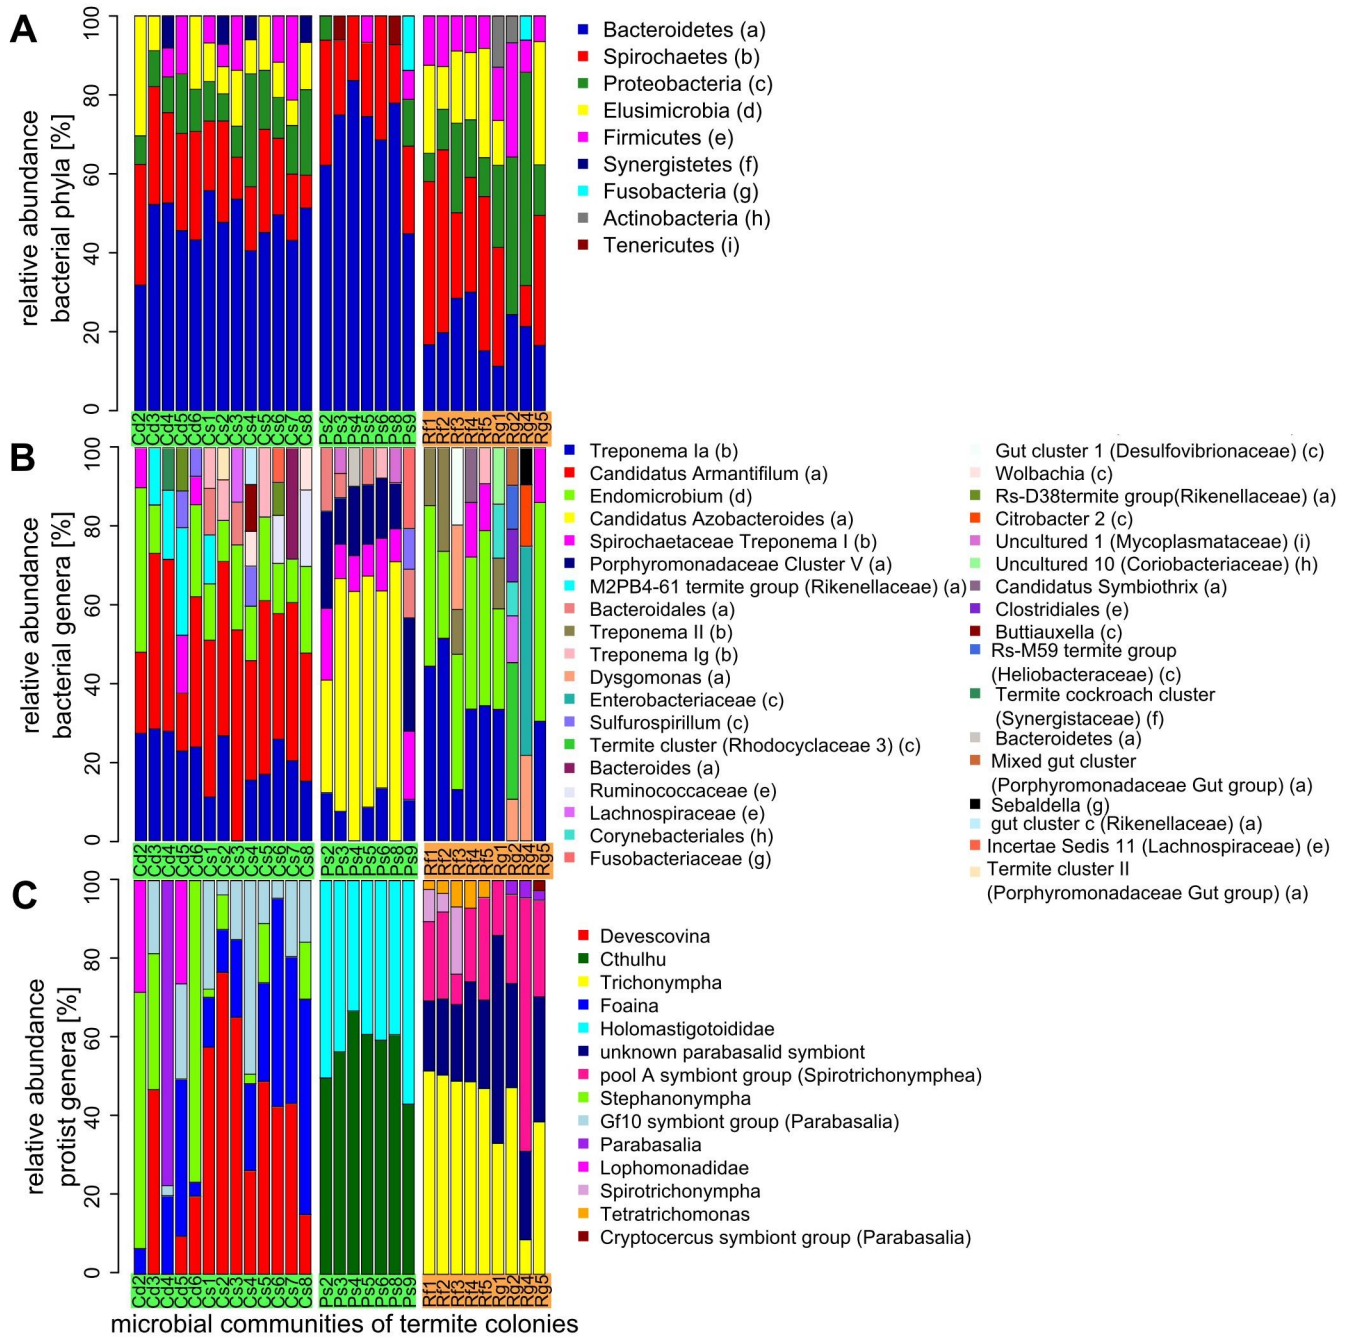

579

580 **Figure 3: Relative abundance of bacterial and protist taxa as assessed**

581 **by taxonomic profiling of 16S- and 18S rRNA gene sequences.** Legends

582 are sorted by abundance beginning with the most abundant taxa (A) Relative

583 abundance of bacterial phyla. Phyla with a relative abundance <5% were

584 removed for clarity. (B) Relative abundance of bacterial genera. Sequences that

585 could not be classified to genus level with sufficient bootstrap support were

586 labeled with the next higher taxonomic rank that could be assigned with

587 sufficient support. Genus level classifications with unconventional names (e.g.

588 “Gut cluster 1”) are followed by family classification in parentheses. Letters in  
 589 parentheses correspond to phyla in A. Genera of abundance <5% have been  
 590 removed for clarity. (C) Relative abundance of protist genera. See B for non genus  
 591 level classifications. Genera with an abundance <2% have been removed. Cd =  
 592 colonies of *C. domesticus*, Cs = *C. secundus*, Ps = *P. simplex*, Rf = *R. flavipes*, Rg  
 593 = *R. grassei*.  
 594

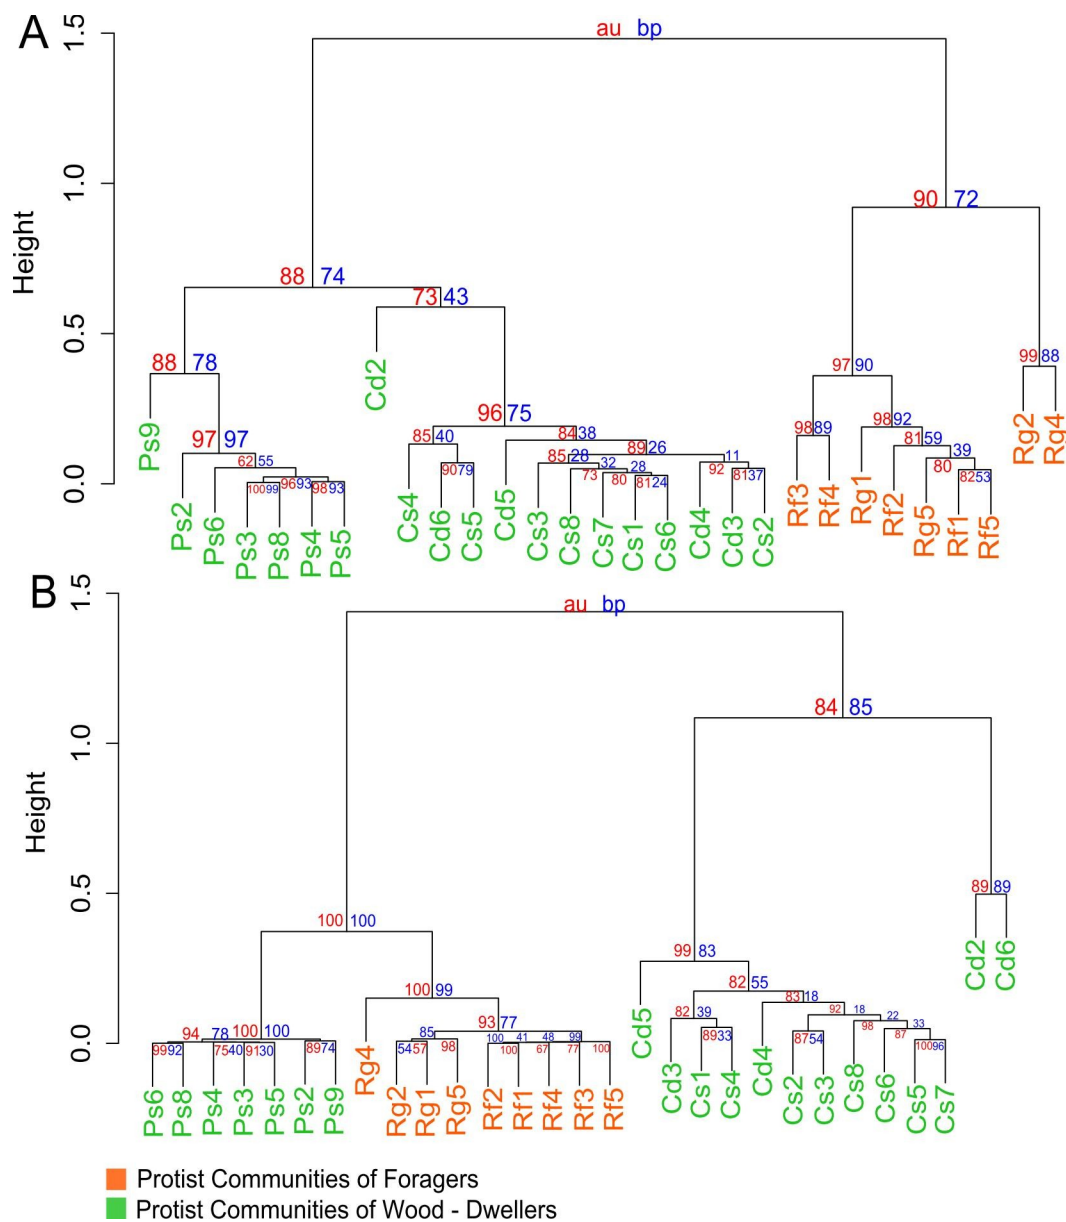

596 **Figure 4: Cluster dendrograms based on weighted UniFrac community**  
 597 **distances.** (A) Cluster dendrogram based on bacterial community distances. (B)  
 598 Cluster dendrogram based on protist community distance. Cd = colonies of *C.*

599 *domesticus*, Cs = *C. secundus*, Ps = *P. simplex*, Rf = *R. flavipes*, Rg = *R. grassei*.  
 600 blue numbers = bootstrap probability; red numbers = approximate unbiased  
 601 probability.

602

603 **Table 1: Average Shannon - diversity indices of bacterial and protist**  
 604 **communities based on 97% sequence similarity OTUs.** n = number of  
 605 replicate colonies for each species; H = Average Shannon-Diversity; SD =  
 606 Standard deviation; P = p-values of Wilcoxon test on Shannon-Diversity wood-  
 607 dweller vs. forager.

|                              | <b>C.<br/>domesticu<br/>s</b> | <b>C.<br/>secundu<br/>s</b> | <b>P.<br/>simple<br/>x</b> | <b>R.<br/>flavipe<br/>s</b> | <b>R.<br/>grasse<br/>i</b> | <b>wood-<br/>dweller</b> | <b>forager</b> | <b>P</b> |
|------------------------------|-------------------------------|-----------------------------|----------------------------|-----------------------------|----------------------------|--------------------------|----------------|----------|
| <b>n</b>                     | 5                             | 8                           | 7                          | 5                           | 4                          | 20                       | 9              |          |
| <b>Bacterial community</b>   |                               |                             |                            |                             |                            |                          |                |          |
| <b>OTUs</b>                  | 450                           | 509                         | 490                        | 697                         | 559                        | 481                      | 636            |          |
| <b>H</b>                     | 3.56                          | 3.42                        | 3.14                       | 4.3                         | 3.72                       | 3.37                     | 4.04           | 0.005    |
| <b>SD</b>                    | 0.25                          | 0.3                         | 0.45                       | 0.25                        | 0.87                       | 0.37                     | 0.64           |          |
| <b>Parabasalid community</b> |                               |                             |                            |                             |                            |                          |                |          |
| <b>OTUs</b>                  | 31                            | 21                          | 21                         | 36                          | 36                         | 23                       | 36             |          |
| <b>H</b>                     | 1.15                          | 1.37                        | 0.7                        | 1.63                        | 1.23                       | 1.08                     | 1.45           | 0.03     |
| <b>SD</b>                    | 0.52                          | 0.2                         | 0.02                       | 0.1                         | 0.37                       | 0.4                      | 0.32           |          |

608

609

610 **Table 2: Bacterial Indicator OTUs of *Reticulitermes*.** Shown are indicator  
 611 OTUs with an indicator value larger than 99.9 and  $P < 0.001$  that comprise at  
 612 least 1,000 sequences and have no known close relatives in wood-dwellers.  
 613 IndVal = Indicator value; DictDb ID refers to the label set in DictDb\_v3.

| <b>OTU</b>      | <b>#sequences</b> | <b>Taxonomy</b>                           | <b>IndVal</b> | <b>P</b> |
|-----------------|-------------------|-------------------------------------------|---------------|----------|
| <b>Otu00007</b> | 23425             | <i>Endomicrobium</i>                      | 99.98         | <0.001   |
| <b>Otu00020</b> | 12960             | <i>Endomicrobium</i>                      | 99.98         | <0.001   |
| <b>Otu00052</b> | 12461             | <i>Termite Cluster (Rhodocyclaceae 3)</i> | 99.99         | <0.001   |
| <b>Otu00003</b> | 12282             | <i>Treponema la</i>                       | 99.96         | <0.001   |

|                 |      |                                                        |       |        |
|-----------------|------|--------------------------------------------------------|-------|--------|
| <b>Otu00049</b> | 7539 | <i>Treponema ll</i>                                    | 100   | <0.001 |
| <b>Otu00019</b> | 6690 | <i>Treponema la</i>                                    | 99.97 | <0.001 |
| <b>Otu00056</b> | 5936 | <i>Gut Cluster 1</i><br>( <i>Desulfovibrionaceae</i> ) | 99.95 | <0.001 |
| <b>Otu00050</b> | 3414 | <i>Treponema la</i>                                    | 99.99 | <0.001 |
| <b>Otu00077</b> | 2726 | <i>Incertae Sedis 34</i><br>( <i>Lachnospiraceae</i> ) | 99.98 | <0.001 |
| <b>Otu00058</b> | 2505 | <i>Lactococcus 3</i>                                   | 99.98 | <0.001 |

---
